# Supplementary material for: A Machine Learning-Based Severity Prediction Tool for the Michigan Neuropathy Screening Instrument
Source: MDPI journal article supplement (doi:10.3390/diagnostics13020264), 2023-01-11
Supplement: s1 [file s1]

# A Machine Learning-Based Severity Prediction Tool for Michigan Neuropathy Screening Instrumentations

Fahmida Haque <sup>1,2</sup>, Mamun B. I. Reaz <sup>1,3,\*</sup>, Muhammad E. H. Chowdhury <sup>4,\*</sup>,  
Mohd Ibrahim bin Shapiai @ Abd. Razak <sup>3</sup>, Rayaz Malik <sup>5</sup>, Mohammed Alhatou <sup>6</sup>, Syoji Kobashi <sup>7</sup>,  
Iffat Ara <sup>4</sup>, Sawal H. M. Ali <sup>1</sup>, Ahmad A. A. Bakar <sup>1</sup> and Mohammad A. S. Bhuiyan <sup>8,\*</sup>

<sup>1</sup> Centre of Advanced Electronic and Communication Engineering, Department of Electrical, Electronic and Systems Engineering, Universiti Kebangsaan Malaysia, 43600 UKM, Bangi, Selangor, Malaysia

<sup>2</sup> Laboratory of Emotions Neurobiology, Nencki Institute of Experimental Biology, Polish Academy of Sciences, Ludwika Pasteura 3, 02-093 Warszawa, Poland

<sup>3</sup> Malaysia-Japan International Institute of Technology, Universiti Teknologi Malaysia, Jalan Sultan Yahya Petra, 54100 Kuala Lumpur, Malaysia

<sup>4</sup> Department of Electrical Engineering, Qatar University, Doha 2713, Qatar

<sup>5</sup> Department of Medicine, Weill Cornell Medicine-Qatar, Ar-Rayyan 24144, Qatar

<sup>6</sup> Neuromuscular Division, Hamad General Hospital, Doha 3050, Qatar

<sup>7</sup> Department of Neurology, Al khor Hospital, Doha 3050, Qatar

<sup>8</sup> Graduate School of Engineering, University of Hyogo, Himeji 678-1297, Hyogo, Japan

<sup>9</sup> Department of Electrical and Electronics Engineering, Xiamen University Malaysia, Sepang 43900, Malaysia

\* Correspondence: mamun@ukm.edu.my (M.B.I.R.); mchowdhury@qu.edu.qa (M.E.H.C.); arifsobhan.bhuiyan@xmu.edu.my (M.A.S.B.)

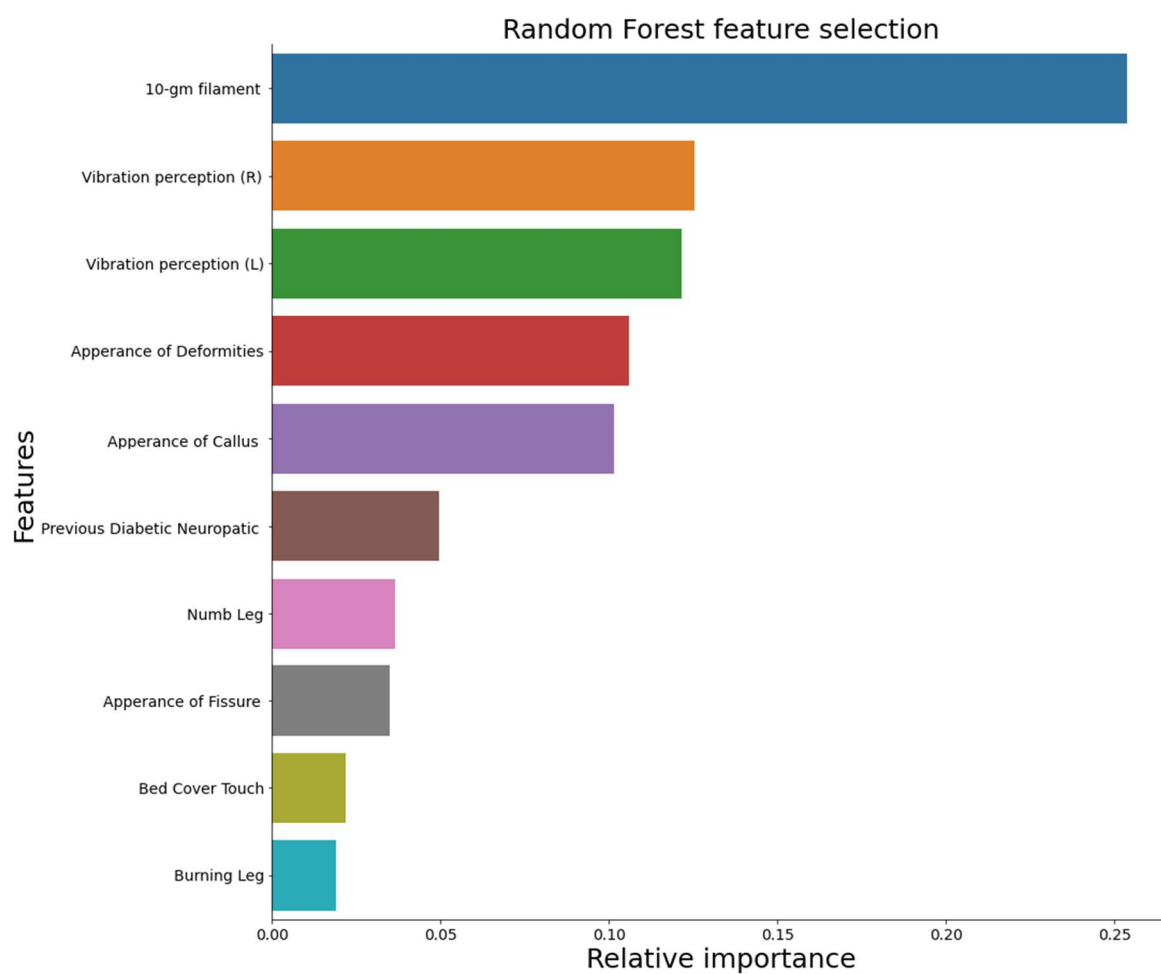

Figure S1. Top-ranked 10 features identified using Random Forest algorithm from data imputed using MICE algorithm.

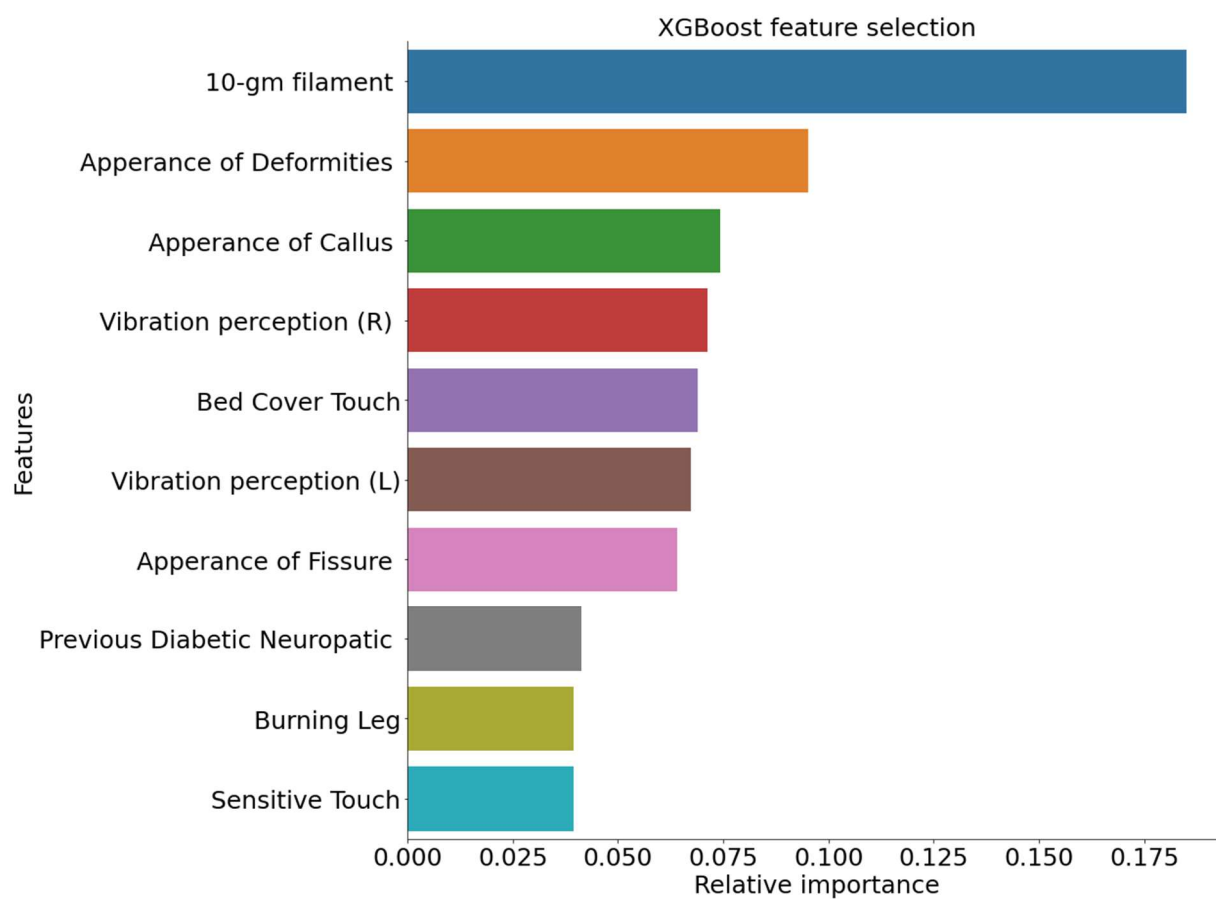

Figure S2. Top-ranked 10 features identified using Xgboost algorithm from data imputed using MICE algorithm

**Table S1.** Comparison of the average performance matrix and confusion matrix from five-fold cross-validation for top 1 to 10 features using MICE data imputation and logistic regression classification techniques for XGBoost feature selection algorithms.

|                 | Sensitivity | Specificity | Accuracy  | Precision | F1 Score  | Non-DSPN |     | DSPN |      |
|-----------------|-------------|-------------|-----------|-----------|-----------|----------|-----|------|------|
|                 |             |             |           |           |           | TP       | FN  | FP   | TN   |
| Top 1 Feature   | 0.61±0.11   | 0.89±0.03   | 0.78±0.05 | 0.81±0.05 | 0.70±0.09 | 1975     | 236 | 625  | 995  |
| Top 2 Features  | 0.65±0.10   | 0.88±0.02   | 0.78±0.05 | 0.80±0.05 | 0.72±0.08 | 1947     | 264 | 560  | 1060 |
| Top 3 Features  | 0.75±0.05   | 0.91±0.03   | 0.84±0.03 | 0.86±0.05 | 0.80±0.04 | 2022     | 189 | 410  | 1210 |
| Top 4 Features  | 0.79±0.03   | 0.90±0.07   | 0.85±0.05 | 0.85±0.09 | 0.82±0.05 | 1981     | 230 | 342  | 1278 |
| Top 5 Features  | 0.80±0.05   | 0.89±0.07   | 0.85±0.06 | 0.84±0.09 | 0.82±0.06 | 1969     | 242 | 320  | 1300 |
| Top 6 Features  | 0.85±0.04   | 0.96±0.04   | 0.91±0.03 | 0.94±0.06 | 0.89±0.04 | 2118     | 93  | 241  | 1379 |
| Top 7 Features  | 0.90±0.03   | 0.94±0.03   | 0.91±0.02 | 0.94±0.04 | 0.90±0.03 | 2057     | 154 | 162  | 1458 |
| Top 8 Features  | 0.91±0.04   | 0.95±0.04   | 0.93±0.03 | 0.93±0.06 | 0.92±0.04 | 2099     | 112 | 150  | 1470 |
| Top 9 Features  | 0.89±0.04   | 0.91±0.04   | 0.90±0.03 | 0.90±0.06 | 0.89±0.04 | 2014     | 197 | 187  | 1433 |
| Top 10 Features | 0.88±0.05   | 0.94±0.04   | 0.91±0.03 | 0.91±0.05 | 0.90±0.04 | 2073     | 138 | 191  | 1429 |

**Table S2.** MNSI variables score from the generated nomogram.

| Top 7 MNSI variables          | Response on MNSI | Corresponding Score |
|-------------------------------|------------------|---------------------|
|                               | 0                | 0                   |
|                               | 0.5              | 2.5                 |
| 10-gm filament                | 1                | 5                   |
|                               | 1.5              | 7.5                 |
|                               | 2                | 10                  |
|                               | 0                | 0                   |
| Vibration perception (R)      | 0.5              | 2.4                 |
|                               | 1                | 4.8                 |
|                               | 0                | 0                   |
| Vibration perception (L)      | 0.5              | 1.9                 |
|                               | 1                | 3.8                 |
|                               | 0                | 0                   |
| Appearance of Deformities     | 1                | 4.8                 |
|                               | 0                | 0                   |
| Appearance of Callus          | 1                | 4.1                 |
|                               | 0                | 0                   |
| Previous Diabetic Neuropathic | 1                | 2.1                 |
|                               | 0                | 0                   |
| Appearance of Fissure         | 1                | 5.2                 |
